# Supplementary material
Source: PubMed Central journal article supplement (PMC4783793)
Supplement: NIHMS741403-supplement-1.pdf [file NIHMS741403-supplement-1.pdf]

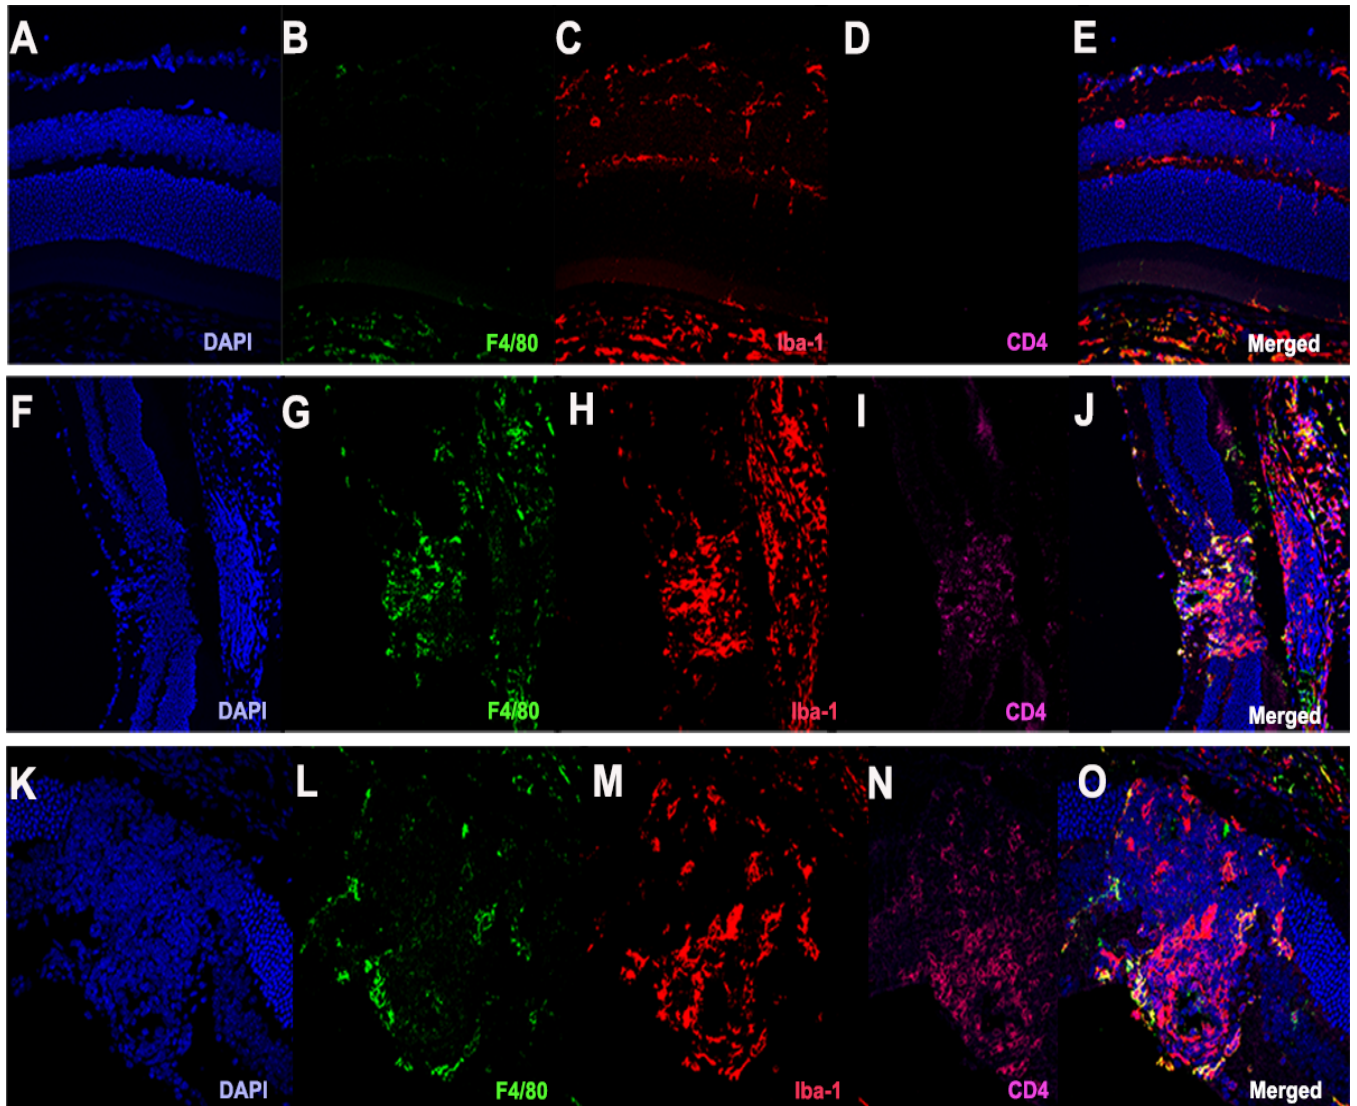

**Supplemental Figure 1- Retinal lymphoid aggregates contain microglia and macrophages.** (A,F,K) DAPI staining (blue). (B, G, L) F4/80, which stains macrophages (green). (C, H, M) Shows Iba-1 staining which stains microglia (red). (D, I, J) CD4<sup>+</sup> T cell staining (magenta). (E, J, O) Merged image staining for all markers. (A-E) R161H retina without retinal lymphoid aggregates at 20x magnification. There is very little staining for CD4<sup>+</sup> T cells or macrophages in these retinas, but microglia are present. (F-J) 20x magnification of R161H retina with a lymphoid aggregate. There is significant staining for both macrophages and microglia localized within the retinal aggregate structure. (K-O) 40x magnification showing abundant presence of microglia and macrophages within the R161H retinal lymphoid aggregate structure.

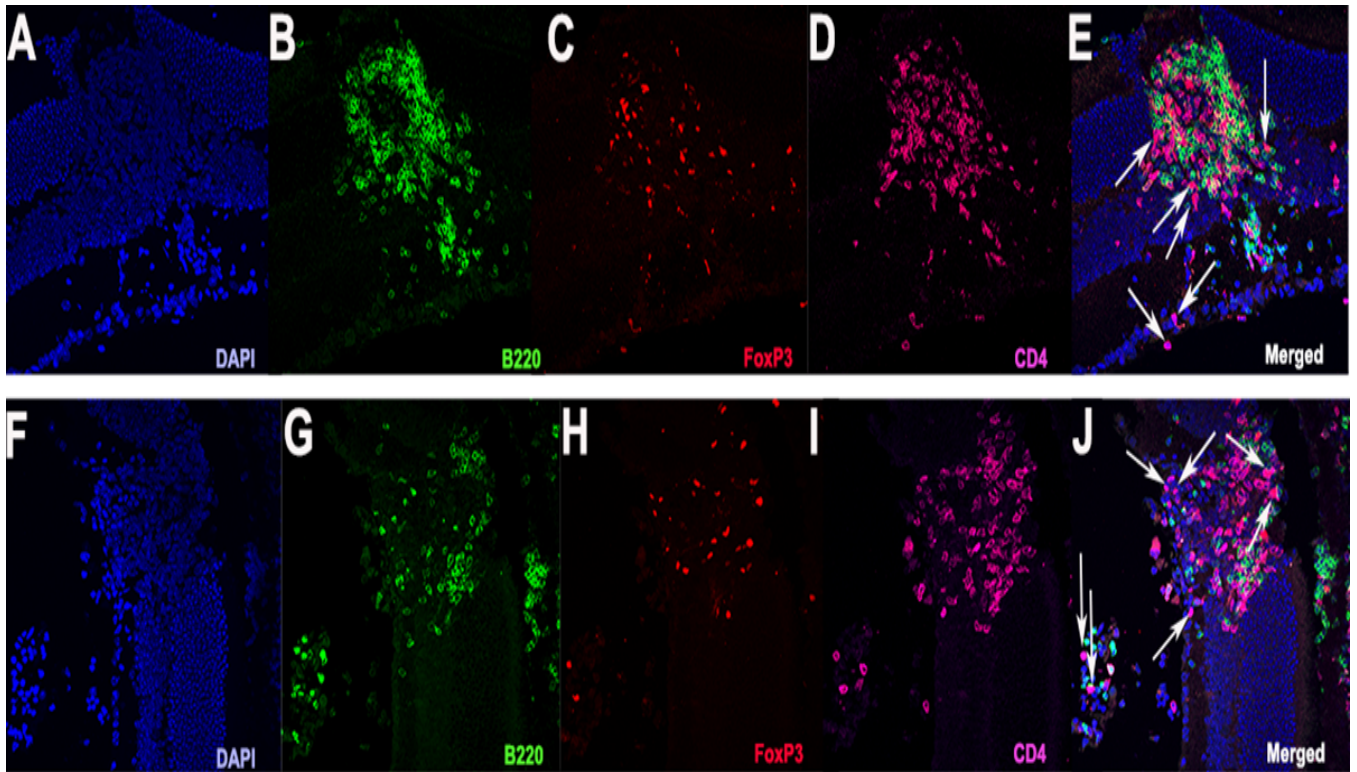

**Supplemental Figure 2- Retinal lymphoid aggregates contain CD4<sup>+</sup>/FoxP3<sup>+</sup> regulatory T cells. (A-J)** Retinal TLT under 40x magnification. White arrows show CD4<sup>+</sup>/FoxP3<sup>+</sup> T cells.
